# Supplementary material for: Contributions of Disease Severity, Psychosocial Factors, and Cognition to Behavioral Functioning in US Youth Perinatally Exposed to HIV
Source: Springer Nature journal article supplement (doi:10.1007/s10461-016-1508-5), 2016-07-30
Supplement: MOESM1 [file 10548008]

**Supplemental Table 1. Loadings of observed variables on latent factors from structural equation models for perinatally HIV-infected youth**

| **Observed Variable*** | **Behavioral Functioning Outcome** | |
| --- | --- | --- |
| **Child-assessed**  **Loading (SE), Z, p-value** | **Caregiver-assessed**  **Loading (SE), Z, p-value** |
| **Latent variable: Behavioral functioning** | | |
| Child-reported BASC T-scores |  |  |
| Inattention/Hyperactivity T-score | 0.59 (0.052), Z=11.29, <0.001 | -- |
| Internalizing T-score | 0.89 (0.042), Z=21.11, <0.001 | -- |
| Personal Adjustment T-score | -0.66 (0.049), Z=-13.45, <0.001 | -- |
| School Problems T-score | 0.43 (0.061), Z=6.96, <0.001 |  |
| Caregiver-reported BASC T-scores |  |  |
| Externalizing T-score | -- | 0.78 (0.042), Z=18.60, <0.001 |
| Internalizing T-score | -- | 0.65 (0.048), Z=13.60, <0.001 |
| Adaptability T-score | -- | -0.83 (0.040), Z=-20.66, <0.001 |
| **Latent variable: Cognitive functioning** | | |
| WISC/WAIS Perceptual Reasoning | 0.79 (0.033), Z=23.90, <0.001 | 0.79 (0.033), Z=23.63, <0.001 |
| WISC/WAIS Processing Speed | 0.69 (0.041), Z=16.51, <0.001 | 0.69 (0.041), Z=16.72, <0.001 |
| WISC/WAIS Verbal IQ | 0.83 (0.030), Z=27.42, <0.001 | 0.83 (0.030), Z=27.79, <0.001 |
| WISC/WAIS Working memory | 0.72 (0.039), Z=18.40, <0.001 | 0.71 (0.039), Z=18.21, <0.001 |
| **Latent variable: Late presenter** | | |
| Age at HAART initiation (yrs) | 0.51 (0.060), Z=8.56, <0.001 | 0.52 (0.060), Z=8.65, <0.001 |
| Age at nadir CD4% (yrs) | 0.56 (0.057), Z=9.99, <0.001 | 0.57 (0.057), Z=9.99, <0.001 |
| Age at peak viral load (yrs) | 0.85 (0.050), Z=17.04, <0.001 | 0.84 (0.050), Z=16.78, <0.001 |
| Peak viral load (log10 copies/mL) | -0.50 (0.060), Z=-8.29, <0.001 | -0.50 (0.060), Z=-8.21, <0.001 |
| **Latent variable: Better past HIV health** | | |
| CDC Class C | -0.81 (0.053), Z=-15.39, <0.001 | -0.81 (0.052), Z=-15.47, <0.001 |
| HIV-related encephalopathy prior to entry | -0.64 (0.056), Z=-11.47, <0.001 | -0.64 (0.055), Z=-11.53, <0.001 |
| Nadir CD4% | 0.56 (0.059), Z=9.51, <0.001 | 0.55 (0.059), Z=9.45, <0.001 |
| **Latent variable: HIV Control** | | |
| On HAART with PI at study entry | 0.09 (0.078), Z=1.13, 0.26 | 0.09 (0.078), Z=1.18, 0.24 |
| On HAART without PI at study entry | 0.10 (0.078), Z=1.26, 0.21 | 0.09 (0.078), Z=1.22, 0.22 |
| On other ARV at study entry | -0.11 (0.078), Z=-1.41, 0.16 | -0.11 (0.078), Z=-1.43, 0.15 |
| CD4% at entry | 0.79 (0.089), Z=8.91, <0.001 | 0.80 (0.090), Z=8.90, <0.001 |
| Entry RNA viral load (log copies/mL) | -0.56 (0.076), Z=-7.35, <0.001 | -0.55 (0.076), Z=-7.30, <0.001 |
| **Latent variable: Home environment** | | |
| Caregiver is biological parent(s) | -- | 0.14 (0.080), Z=1.72, 0.09 |
| Caregiver is a single biological parent | 0.26 (0.075), Z=3.39, 0.001 | -- |
| Caregiver is both biological parents | -0.23 (0.076), Z=-3.08, 0.002 | -- |
| Caregiver is a relative | 0.18 (0.077), Z=2.34, 0.02 | -- |
| Annual household income < $20K | 0.23 (0.076), Z=2.99, 0.003 | 0.23 (0.078), Z=2.96, 0.003 |
| Married or widowed | -0.75 (0.066), Z=-11.41, <0.001 | -0.72 (0.073), Z=-9.92, <0.001 |
| Separated or divorced | 0.56 (0.066), Z=8.37, <0.001 | 0.57 (0.071), Z=8.05, <0.001 |
| # of reported drugs used last 6 months | 0.15 (0.078), Z=1.91, 0.06 | 0.17 (0.079), Z=2.22, 0.03 |
| # supported by household income | -0.41 (0.070), Z=-5.82, <0.001 | -0.42 (0.072), Z=-5.81, <0.001 |
| **Latent variable: Caregiver- Child stress** | | |
| PCRI: Any problem | 0.25 (0.082), Z=3.10, 0.002 | 0.28 (0.082), Z=3.39, 0.001 |
| Caregiver mental health problem | 0.50 (0.077), Z=6.58, <0.001 | 0.49 (0.078), Z=6.23, <0.001 |
| # negative life events | 0.47 (0.077), Z=6.12, <0.001 | 0.46 (0.078), Z=6.01, <0.001 |
| # Stressful life events | 0.46 (0.077), Z=5.92, <0.001 | 0.47 (0.078), Z=5.94, <0.001 |
| **Latent variable: Caregiver resources** | | |
| Caregiver WASI ≥ 85 | 0.98 (0.095), Z=10.42, <0.001 | 0.96 (0.087), Z=11.06, <0.001 |
| Caregiver WASI not done | -0.52 (0.069), Z=-7.48, <0.001 | -0.53 (0.068), Z=-7.83, <0.001 |
| Caregiver high school graduate | 0.36 (0.067), Z=5.29, <0.001 | 0.36 (0.067), Z=5.42, <0.001 |

SE=standard error, CDC=Centers for Disease Control and Prevention, BASC-2=Behavioral Scales Assessment for Children, Second Edition,WISC-IV=Wechsler Intelligence Scales for Children, Fourth Edition, WAIS-IV=Wechsler Adult Intelligence Scales, Fourth Edition, WASI=Wechsler Abbreviated Scales of Intelligence, PCRI=Parent-Child Relationship Inventory, HAART=Highly active antiretroviral therapy (defined as at least 3 drugs from at least 2 drug classes), ARV=antiretroviral, PI=protease inhibitor

*Subjects missing measures were coded to the median value for continuous covariates, age at HAART initiation (n=3) and viral load at entry (n=2), and to the most common category for categorical variables (income (n=9), # drugs reported (n=18), PCRI problem (n=7), caregiver mental health problem (n=18), negative life events (n=12).

FOOTNOTE: The information presented in Supplemental Table 1 above represents the loading factors for the Exploratory Factor Analysis for PHIV youth. Recall that factor analysis is often utilized to evaluate clustering among predictors and potentially reduce the number of variables such that the remaining constructs are representative of the observed data and explain a significant portion of the variance. The information represented in bold, flush left are the latent variables, or concepts developed by the research team after completing the factor analysis and examining the way in which the observed factors that significantly loaded onto the proposed factor structure.

**Latent Variable: Behavioral Functioning**

Based on the obtained factor pattern and resulting eigenvalues, two factors were retained: the caregiver reported BASC loaded highly onto one factor and the child reported BASC loaded highly on the other factor. This would suggest that, among the PHIV youth, the factor representing the parent viewpoint (BASC-P domains) accounts for more of the common variance in the observed variables than the factor representing the child viewpoint (BASC-C domains). Results of the factor analysis were suggestive of two distinctive factors for both the child and parent versions of the BASC. Because of these findings, it was decided that the full SEM model would be separated into *two* models for PHIV youth, with the parent and child version of the BASC serving as two different endogenous variables.

**Latent Variable: Cognitive Functioning**

All domains of CF assessed on both the WISC and the WAIS across PHIV youth =exhibited moderate correlations. These results in combination with the calculated eigenvalues suggest that a single factor (“cognitive functioning”) could continue to be retained.

**Latent Variables: HIV Disease Severity (Late presenter, Better Past HIV Health and HIV Control)**

Among PHIV youth, results of the EFA supported a 3-factor model for the disease severity variables. In the 3-factor model, age at HAART initiation, age at nadir CD4%, age at peak VL, log peak VL loaded onto Factor 1, higher nadir CD4%, no HIV related encephalopathy at entry, no CDC Class C diagnosis loaded onto Factor 2, and HAART with PI at study entry, HAART without PI at study entry, other ARV at study entry, lower CD4% at entry, higher log entry RNA) loaded onto Factor 3. Based on the factor loading patterns, these three factors were referred to as *Late Presenter (Factor 1), Better Past HIV Health* (Factor 2), and *HIV Control* (Factor 3).

**Latent Variables: Psychosocial Variables (Home Environment, Caregiver-Child Stress, Caregiver Resources)**

The use of a 3-factor model was also supported for the psychosocial variables, but observed factors within the latent concepts differed between caregiver and child-assessed BF on Factor 1. For child-assessed BF, a categorical measure of caregiver relationship (single biological parent, both biological parents, or relative), Annual household income < $20K,Married or widowed,Separated or divorced loaded, # of reported drugs used last 6 months and # supported by household income loaded onto Factor 1. For caregiver-assessed BF, Caregiver is biological parent(s), Annual household income < $20K, Married or Widowed, and Separated or Divorced loaded onto Factor 1. Based on the loading factors, we refer to Factor 1 as *Home Environment.* For both child-assessed and caregiver-assessed PHIV models, PCRI: Any problem, Caregiver mental health problem, # negative life events and # Stressful life events loaded onto Factor 2, which we refer to as *Caregiver-Child Stress.*  Finally, Caregiver WASI ≥ 85, Caregiver WASI not done and Caregiver high school graduate loaded onto Factor 3, which was then referred to as the latent variable *Caregiver Resources.*
